# Supplementary material
Source: Springer Nature journal article supplement (https://www.springermedizin.de/resource/supplementary/12865_2012_473_MOESM1_ESM.pdf/9428040)

**A**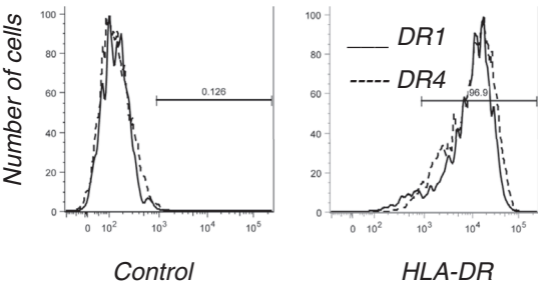**B**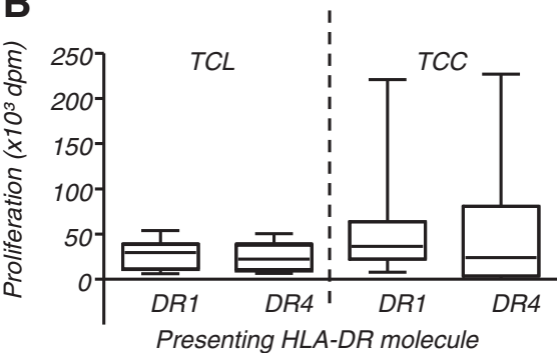**C**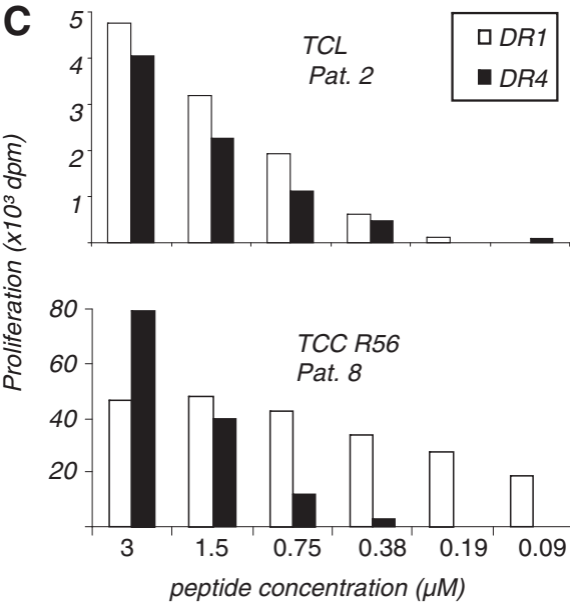

Supplement: MOESM1 [file 9428040]
